# Supplementary material for: Co-application of liquid cattle manure and straw promotes labile organic carbon accumulation and microbial community response in Mollisols
Source: Research Square preprint supplement (doi:10.21203/rs.3.rs-8279946/v1), 2026-01-13
Supplement: Supplementary file 1 [file 40085b33646ba94212cc14a2.docx]

**Supplementary Material**

Fig. S1 Schematic diagram of the sealed storage and anaerobic fermentation bladder for liquid cattle manure

**
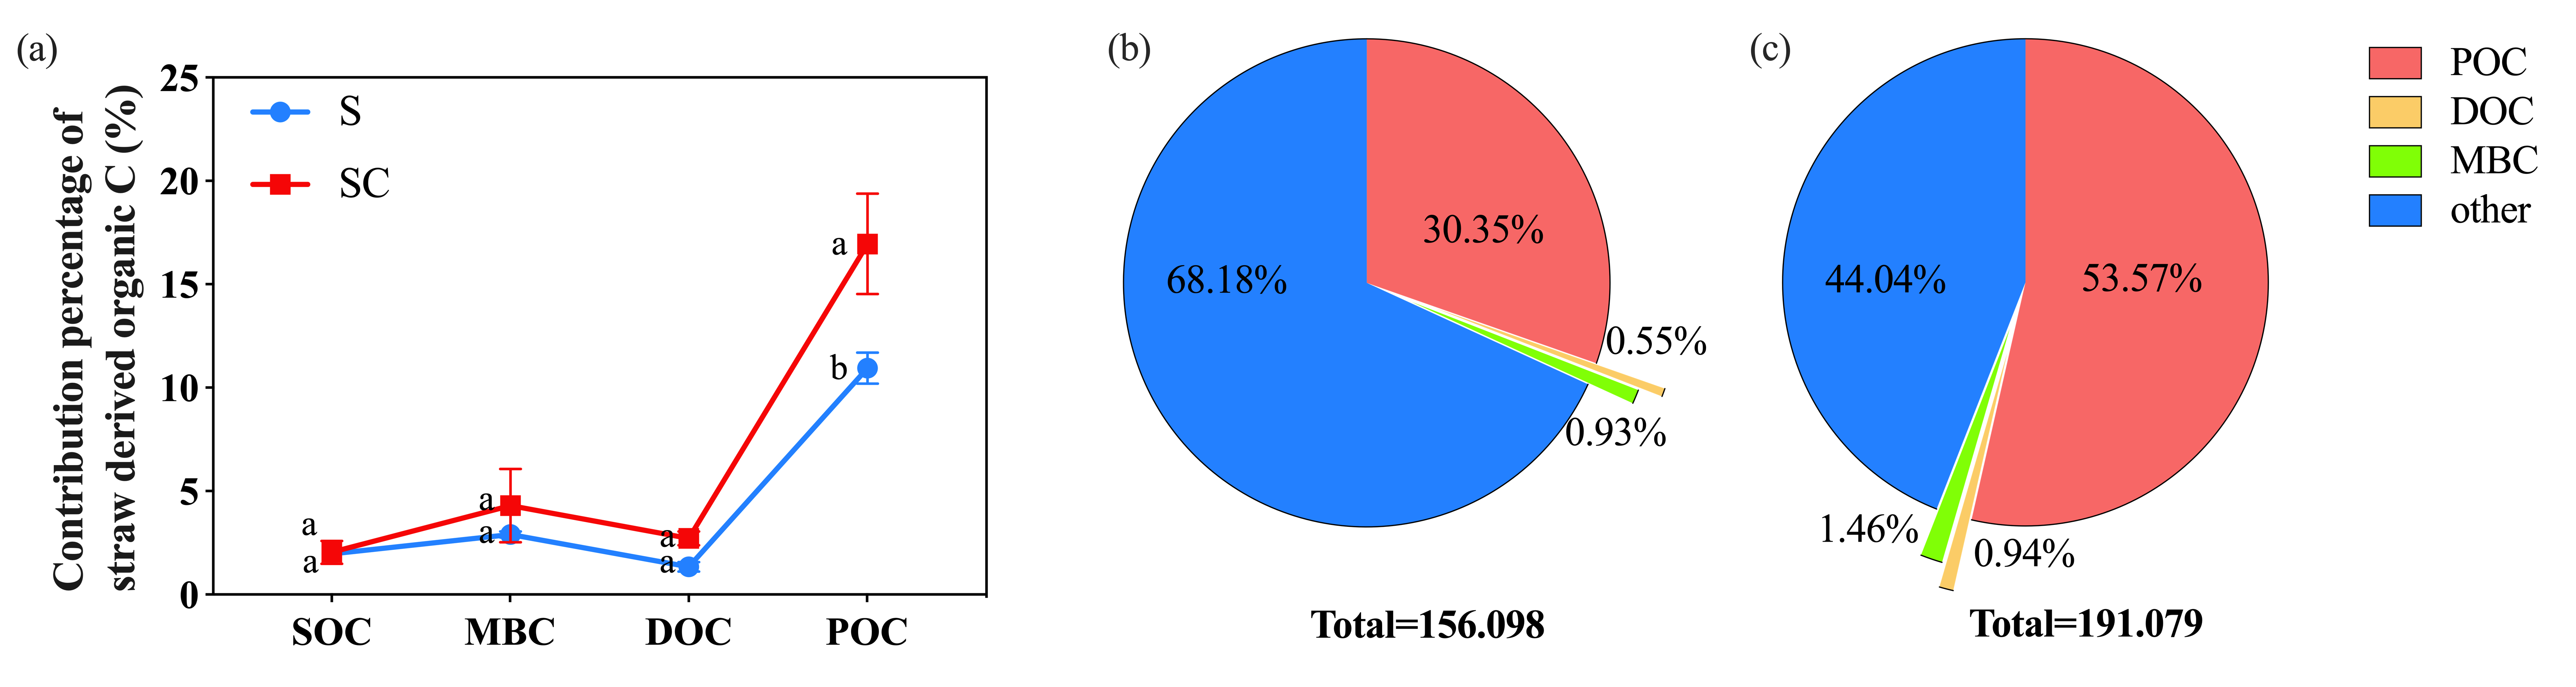
**

Fig. S2 Contribution percentage of straw-derived carbon to SOC, MBC, DOC, and POC at the end of the incubation period (a). Straw-derived SOC content and distribution of straw-derived carbon among fractions under the S (b) and SC (c) treatments at the end of the incubation period. Different letters indicate significant differences among treatments at the same incubation time (P<0.05).

Fig. S3 Potential functions of bacterial communities. (a) KEGG level 3 metabolic pathways present in soil based on PICRUSt analysis; (b) Relative abundance of gene groups involved in the C cycle in soil.

Table S1 The alpha diversity of bacteria in different treatments.

| Incubation days (d) | Alpha diversity | CK | S | SC |
| --- | --- | --- | --- | --- |
| 60 d | Sobs | 3314 ± 61.62 | 3107.33 ± 156.53 | 3275.67 ± 157.38 |
| Simpson | 0.0081 ± 0.0009 | 0.0336 ± 0.0108 | 0.021 ± 0.0089 |
| ACE index | 4254.08 ± 95.54 | 4094.21 ± 168.06 | 4248.76 ± 221.15 |
| Chao 1 index | 4221.73 ± 96.93 | 4006.77 ± 174.83 | 4184.83 ± 257.44 |
| Good’s coverage | 0.98 ± 0.00056 | 0.983 ± 0.00063 | 0.983 ± 0.00112 |
| Shannon | 6.337 ± 0.049 | 5.501 ± 0.262 | 5.88 ± 0.292 |
| 120 d | Sobs | 3459.33 ± 156.6 | 2996.83 ± 343.7 | 3322.83 ± 373.8 |
| Simpson | 0.0051 ± 0.0005 | 0.0734 ± 0.0332 | 0.0341 ± 0.0113 |
| ACE index | 4236.23 ± 266.1 | 3896.96 ± 545.7 | 4333.55 ± 432.5 |
| Chao 1 index | 4219.07 ± 248.39 | 3816.01 ± 523.77 | 4231.996 ± 442.23 |
| Good’s coverage | 0.984 ± 0.00159 | 0.984 ± 0.00326 | 0.982 ± 0.00173 |
| Shannon | 6.56 ± 0.062 | 5.065 ± 0.534 | 5.59 ± 0.338 |
| 180 d | Sobs | 3314 ± 61.62 | 3107.33 ± 156.53 | 3275.67 ± 157.38 |
| Simpson | 0.0081 ± 0.0009 | 0.0336 ± 0.0108 | 0.021 ± 0.0089 |
| ACE index | 4254.08 ± 95.54 | 4094.21 ± 168.06 | 4248.76 ± 221.15 |
| Chao 1 index | 4221.73 ± 96.93 | 4006.77 ± 174.83 | 4184.83 ± 257.44 |
| Good’s coverage | 0.98 ± 0.00056 | 0.983 ± 0.00063 | 0.983 ± 0.00112 |
| Shannon | 6.337 ± 0.049 | 5.501 ± 0.262 | 5.88 ± 0.292 |

Table S2 The classification information for each keystone taxa.

| Treatment | OTU | Genus | Phylum | Degree |
| --- | --- | --- | --- | --- |
| 60 d_CK | OTU2066 | Bacillus | Firmicutes | 13 |
| OTU2631 | Gaiella | Actinobacteriota | 13 |
| OTU2306 | norank_o__Acidobacteriales | Acidobacteriota | 11 |
| OTU2889 | norank_f__Gemmatimonadaceae | Gemmatimonadota | 10 |
| OTU1647 | norank_c__KD4-96 | Chloroflexi | 10 |
| OTU2112 | norank_c__Gitt-GS-136 | Chloroflexi | 10 |
| OTU2267 | Noviherbaspirillum | Proteobacteria | 10 |
| OTU3037 | Bryobacter | Acidobacteriota | 10 |
| OTU2353 | unclassified_f__Comamonadaceae | Proteobacteria | 10 |
| OTU3046 | norank_c__bacteriap25 | Myxococcota | 10 |
| 60 d_S | OTU8143 | Candidatus_Solibacter | Acidobacteriota | 22 |
| OTU2884 | Bacillus | Firmicutes | 21 |
| OTU1329 | Candidatus_Solibacter | Acidobacteriota | 21 |
| OTU7601 | Tumebacillus | Firmicutes | 21 |
| OTU2259 | norank_f__Methyloligellaceae | Proteobacteria | 21 |
| OTU1404 | norank_o__Gaiellales | Actinobacteriota | 21 |
| OTU2553 | mle1-7 | Proteobacteria | 21 |
| OTU1718 | Gaiella | Actinobacteriota | 21 |
| OTU1332 | Burkholderia-Caballeronia-Paraburkholderia | Proteobacteria | 21 |
| OTU2536 | norank_o__Gaiellales | Actinobacteriota | 21 |
| 60 d_SC | OTU1981 | norank_o__Gaiellales | Actinobacteriota | 25 |
| OTU1971 | norank_o__Vicinamibacterales | Acidobacteriota | 20 |
| OTU8148 | Asticcacaulis | Proteobacteria | 20 |
| OTU6119 | Sphingomonas | Proteobacteria | 20 |
| OTU2877 | unclassified_c__Actinobacteria | Actinobacteriota | 20 |
| OTU3081 | norank_f__Gemmatimonadaceae | Gemmatimonadota | 20 |
| OTU1385 | Burkholderia-Caballeronia-Paraburkholderia | Proteobacteria | 20 |
| OTU2744 | norank_o__Gaiellales | Actinobacteriota | 17 |
| OTU2498 | norank_c__KD4-96 | Chloroflexi | 17 |
| OTU2259 | norank_f__Methyloligellaceae | Proteobacteria | 17 |
| 120 d_CK | OTU7963 | norank_c__bacteriap25 | Myxococcota | 12 |
| OTU8080 | Candidatus_Udaeobacter | Verrucomicrobiota | 12 |
| OTU7360 | Micromonospora | Actinobacteriota | 12 |
| OTU7396 | norank_o__Acidobacteriales | Acidobacteriota | 12 |
| OTU9698 | unclassified_o__Acidobacteriales | Acidobacteriota | 11 |
| OTU8167 | Gaiella | Actinobacteriota | 10 |
| OTU7100 | Candidatus_Udaeobacter | Verrucomicrobiota | 10 |
| OTU5624 | norank_o__Acidobacteriales | Acidobacteriota | 10 |
| OTU7574 | Bacillus | Firmicutes | 9 |
| OTU7405 | Candidatus_Udaeobacter | Verrucomicrobiota | 9 |
| 120 d_S | OTU7189 | Subgroup_1 | Acidobacteriota | 17 |
| OTU6925 | norank_o__Acidobacteriales | Acidobacteriota | 17 |
| OTU8080 | Candidatus_Udaeobacter | Verrucomicrobiota | 17 |
| OTU7557 | Candidatus_Udaeobacter | Verrucomicrobiota | 17 |
| OTU6915 | Candidatus_Udaeobacter | Verrucomicrobiota | 17 |
| OTU5624 | norank_o__Acidobacteriales | Acidobacteriota | 17 |
| OTU1602 | Candidatus_Udaeobacter | Verrucomicrobiota | 17 |
| OTU6993 | norank_f__Vicinamibacteraceae | Acidobacteriota | 13 |
| OTU7224 | Gemmatimonas | Gemmatimonadota | 13 |
| OTU7657 | Parafilimonas | Bacteroidota | 13 |
| 120 d_SC | OTU6678 | norank_o__Acidobacteriales | Acidobacteriota | 11 |
| OTU6925 | norank_o__Acidobacteriales | Acidobacteriota | 11 |
| OTU7852 | Candidatus_Solibacter | Acidobacteriota | 11 |
| OTU6687 | norank_f__Acidobacteriaceae_Subgroup_1 | Acidobacteriota | 11 |
| OTU8069 | Candidatus_Koribacter | Acidobacteriota | 11 |
| OTU7530 | norank_o__Acidobacteriales | Acidobacteriota | 10 |
| OTU6993 | norank_f__Vicinamibacteraceae | Acidobacteriota | 10 |
| OTU6724 | Flavisolibacter | Bacteroidota | 10 |
| OTU8059 | Bryobacter | Acidobacteriota | 10 |
| OTU7034 | Bryobacter | Acidobacteriota | 10 |
| 180 d_CK | OTU9358 | norank_o__Acidobacteriales | Acidobacteriota | 12 |
| OTU3927 | Paenibacillus | Firmicutes | 12 |
| OTU5213 | Candidatus_Udaeobacter | Verrucomicrobiota | 12 |
| OTU8148 | Paenibacillus | Firmicutes | 12 |
| OTU8953 | norank_f__Methyloligellaceae | Proteobacteria | 11 |
| OTU9521 | norank_f__Chitinophagaceae | Bacteroidota | 11 |
| OTU8413 | norank_f__Gemmatimonadaceae | Gemmatimonadota | 11 |
| OTU8954 | norank_o__Acidobacteriales | Acidobacteriota | 10 |
| OTU8280 | Candidatus_Udaeobacter | Verrucomicrobiota | 10 |
| OTU8981 | UBA6140 | Proteobacteria | 10 |
| 180 d_S | OTU9305 | unclassified_k__norank_d__Bacteria | unclassified_k__norank_d__Bacteria | 11 |
| OTU8976 | Bacillus | Firmicutes | 9 |
| OTU7799 | Bacillus | Firmicutes | 9 |
| OTU9470 | norank_f__Blastocatellaceae | Acidobacteriota | 9 |
| OTU8072 | unclassified_f__Intrasporangiaceae | Actinobacteriota | 9 |
| OTU9136 | Pseudolabrys | Proteobacteria | 8 |
| OTU9018 | Reyranella | Proteobacteria | 8 |
| OTU8914 | norank_c__MB-A2-108 | Actinobacteriota | 8 |
| OTU8134 | norank_o__C0119 | Chloroflexi | 8 |
| OTU8161 | norank_c__bacteriap25 | Myxococcota | 8 |
| 180 d_SC | OTU9349 | norank_f__SC-I-84 | Proteobacteria | 21 |
| OTU8862 | Bryobacter | Acidobacteriota | 21 |
| OTU8547 | Bryobacter | Acidobacteriota | 21 |
| OTU6569 | unclassified_f__Methylophilaceae | Proteobacteria | 21 |
| OTU8872 | Arthrobacter | Actinobacteriota | 20 |
| OTU8954 | norank_o__Acidobacteriales | Acidobacteriota | 20 |
| OTU8367 | norank_f__Xanthobacteraceae | Proteobacteria | 20 |
| OTU8996 | Nitrospira | Nitrospirota | 20 |
| OTU8072 | unclassified_f__Intrasporangiaceae | Actinobacteriota | 20 |
| OTU3620 | norank_f__Xanthobacteraceae | Proteobacteria | 20 |
